# Supplementary material for: Technical note: Intermittent reduction of the stratospheric ozone over northern Europe caused by a storm in the Atlantic Ocean
Source: Copernicus journal article supplement (doi:10.5194/acp-20-1839-2020), 2020-02-17
Supplement: Supplementary file 1 [file acp-20-1839-2020-supplement.pdf]

Supplement of Atmos. Chem. Phys., 20, 1839–1847, 2020  
<https://doi.org/10.5194/acp-20-1839-2020-supplement>  
© Author(s) 2020. This work is distributed under  
the Creative Commons Attribution 4.0 License.

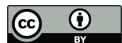

*Supplement of*

## **Technical note: Intermittent reduction of the stratospheric ozone over northern Europe caused by a storm in the Atlantic Ocean**

**Mikhail Sofiev et al.**

*Correspondence to:* Mikhail Sofiev ([mikhail.sofiev@fmi.fi](mailto:mikhail.sofiev@fmi.fi))

The copyright of individual parts of the supplement might differ from the CC BY 4.0 License.

Forecast for O3 column. Last analysis time: 20181101 00

O3\_column, DobsonUnit, 12:0001NOV2018

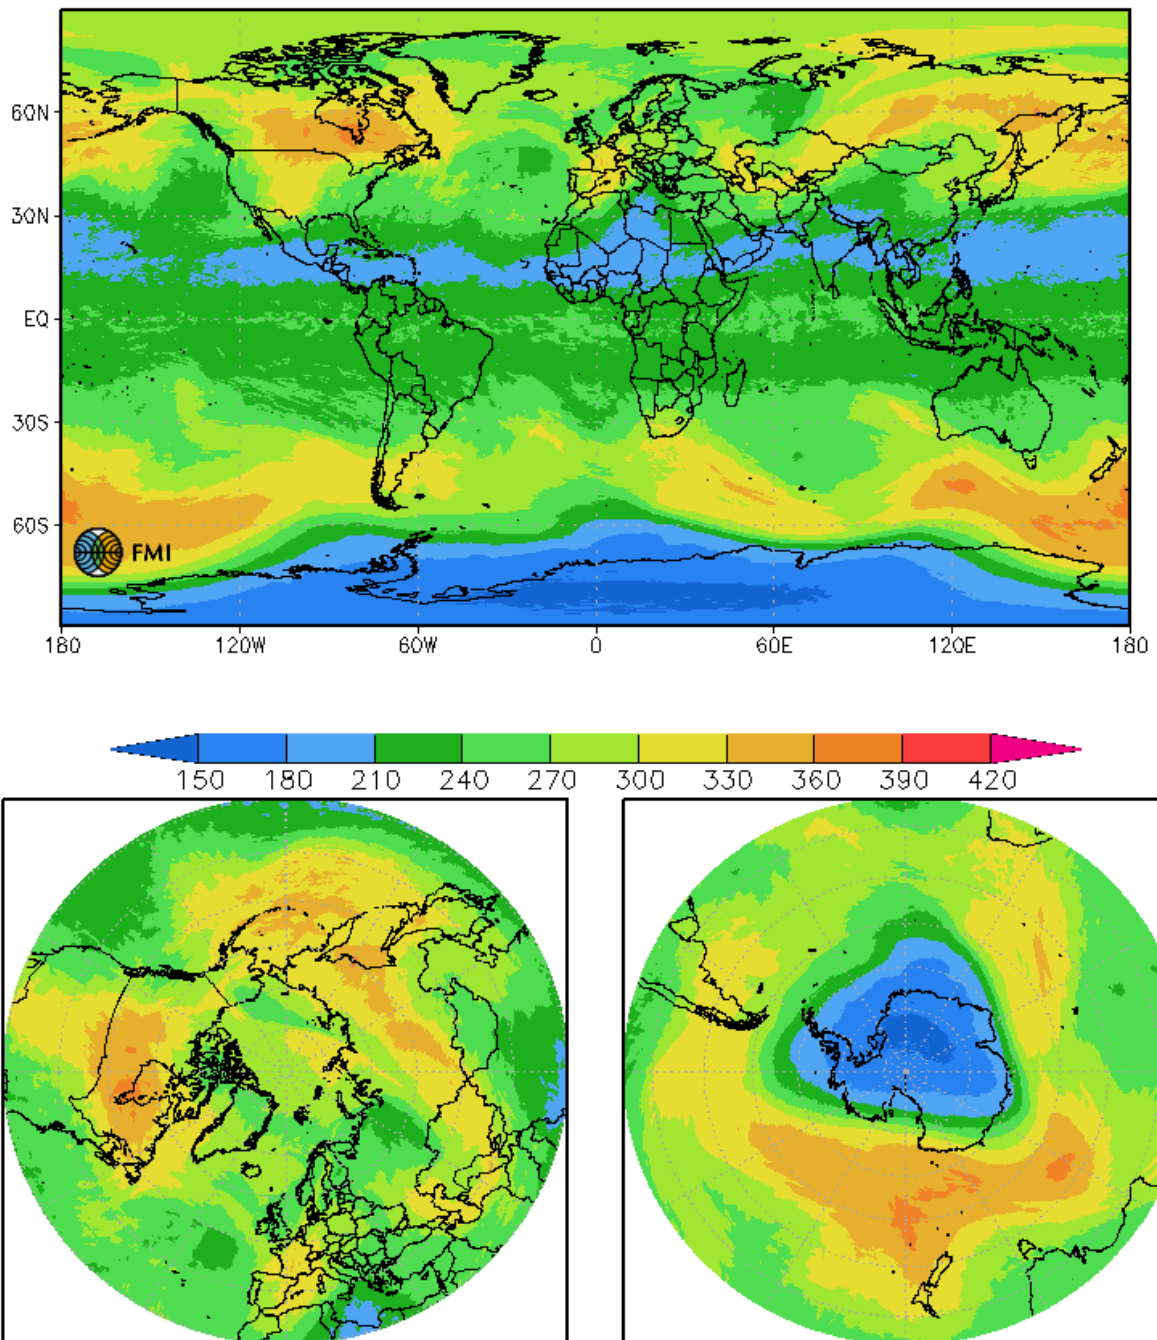

Figure S1. Global ozone column predicted by SILAM on 1.11.2018 for 1.11.2018. [Dobson units]

Forecast for O3 column. Last analysis time: 20181101 00

### O3\_column, DobsonUnit, 12:0002NOV2018

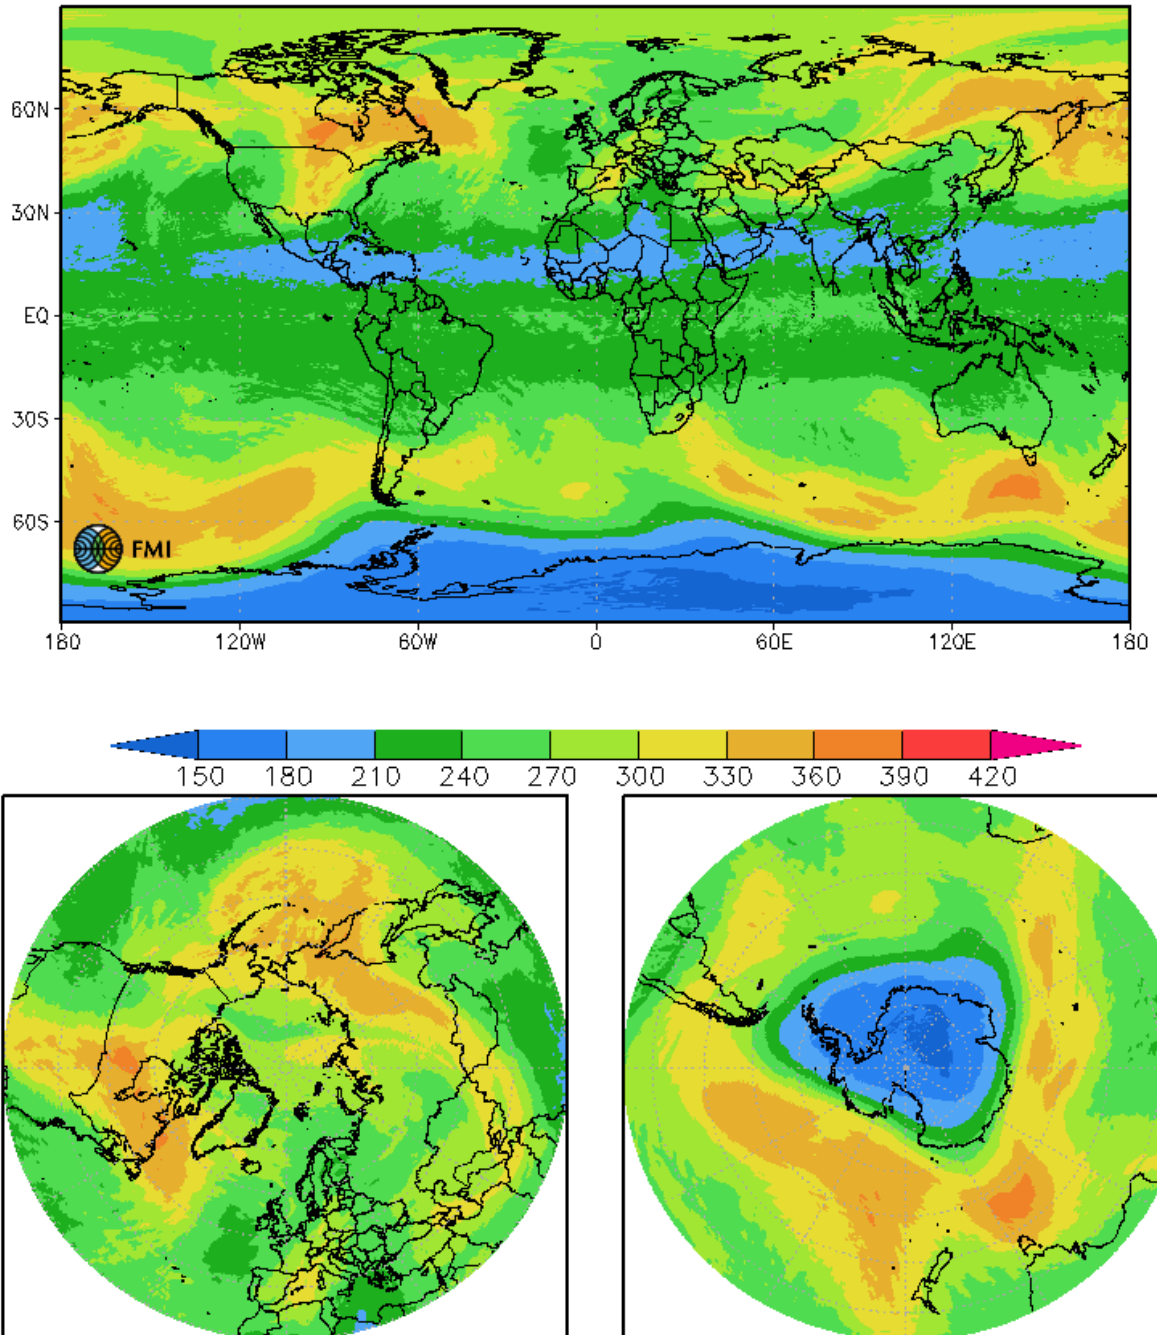

Figure S2. Global ozone column predicted by SILAM on 1.11.2018 for 2.11.2018. [Dobson units]

Forecast for O3 column. Last analysis time: 20181101 00

### O3\_column, DobsonUnit, 12:0003NOV2018

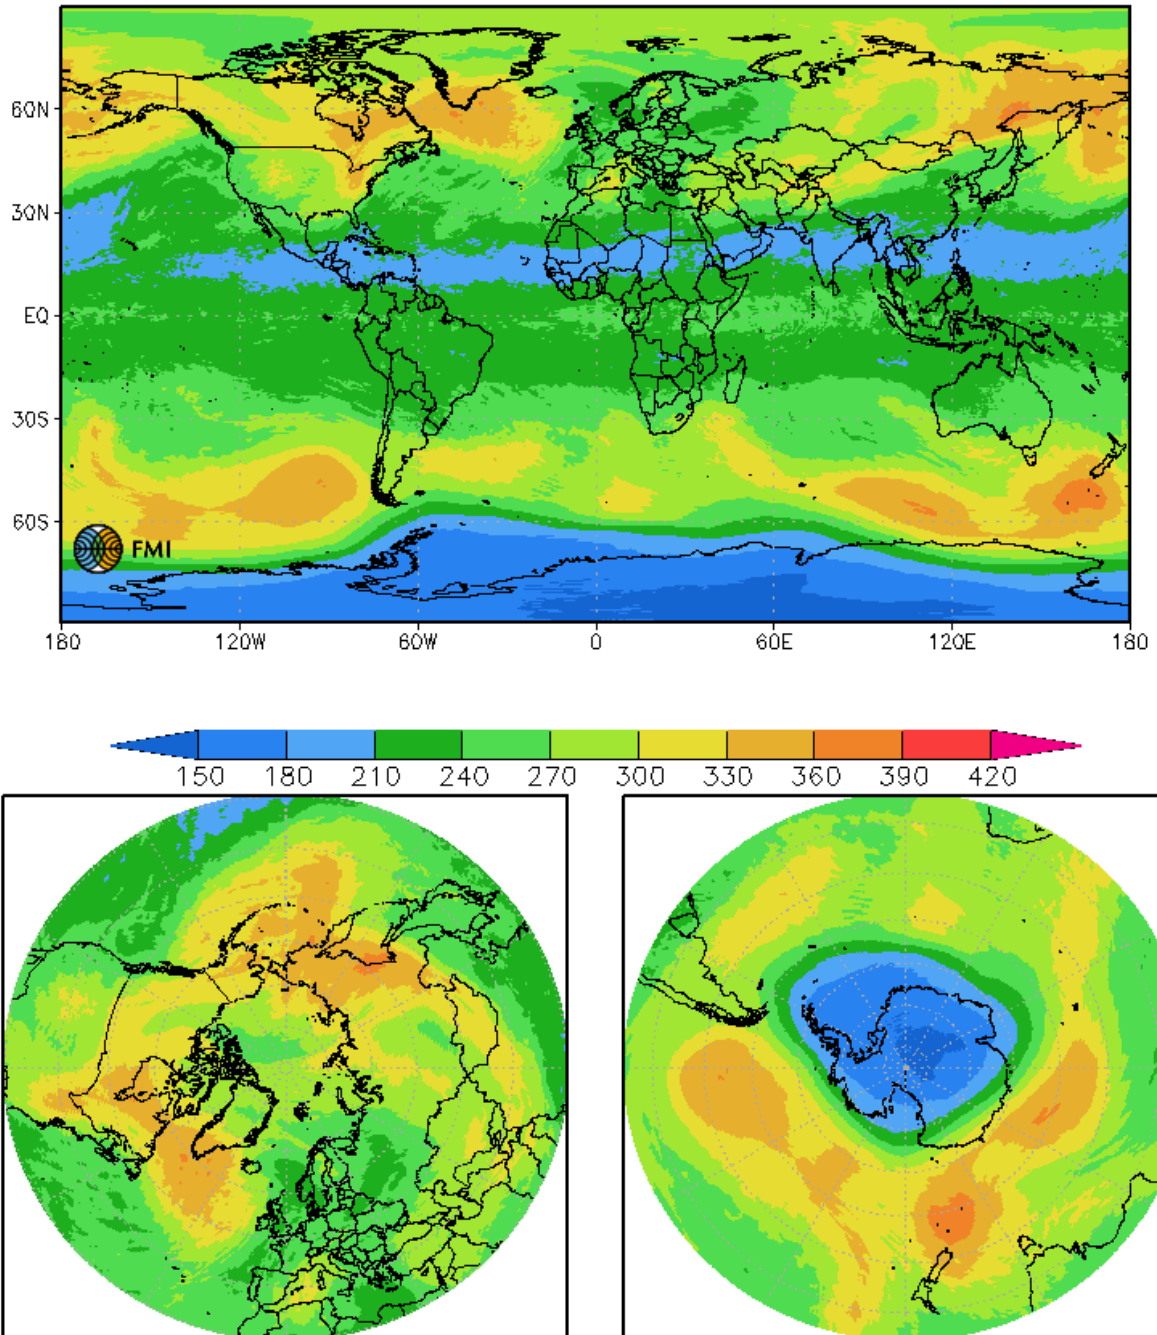

Figure S3. Global ozone column predicted by SILAM on 1.11.2018 for 3.11.2018. [Dobson units]

Forecast for O3 column. Last analysis time: 20181101 00

### O3\_column, DobsonUnit, 12:0004NOV2018

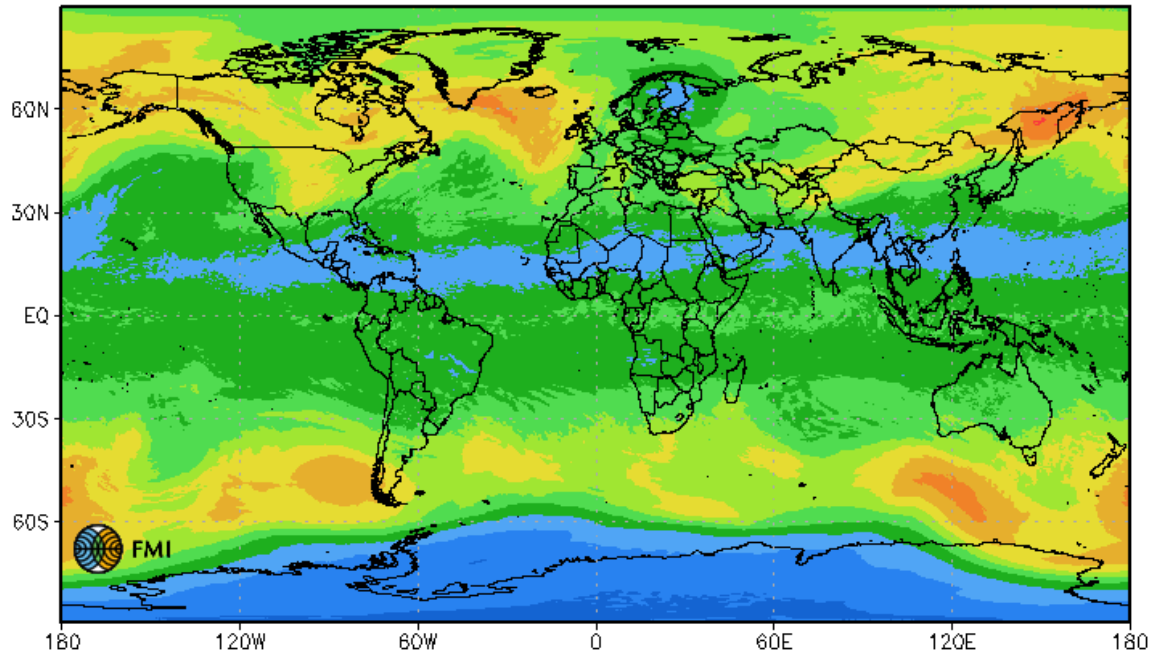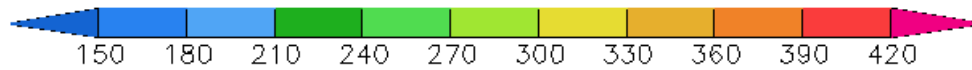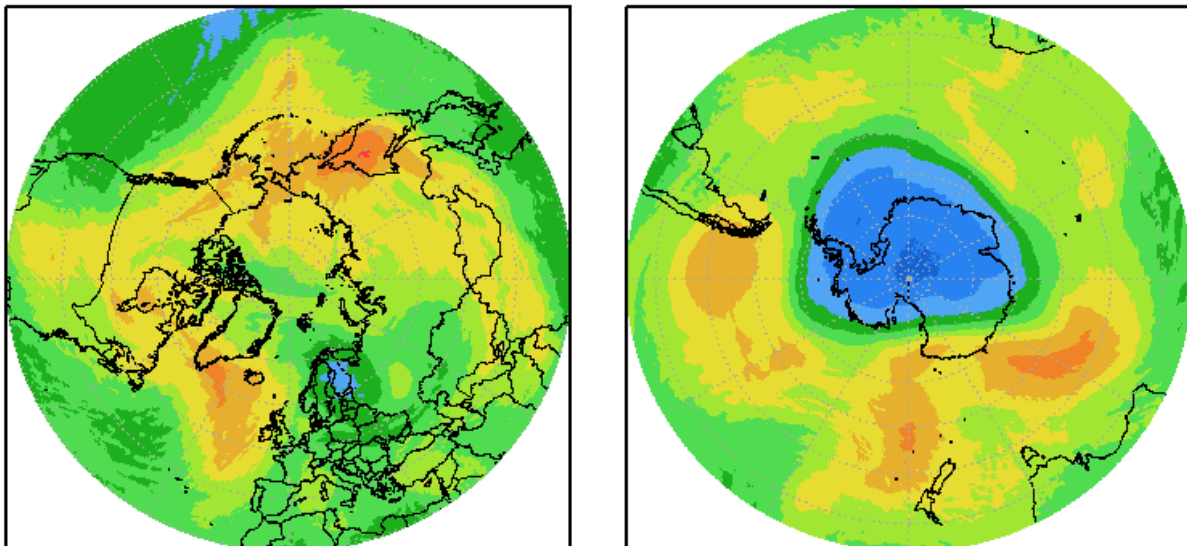

Figure S4. Global ozone column predicted by SILAM on 1.11.2018 for 4.11.2018. [Dobson units]

Forecast for O3 column. Last analysis time: 20181101 00

### O3\_column, DobsonUnit, 12:0005NOV2018

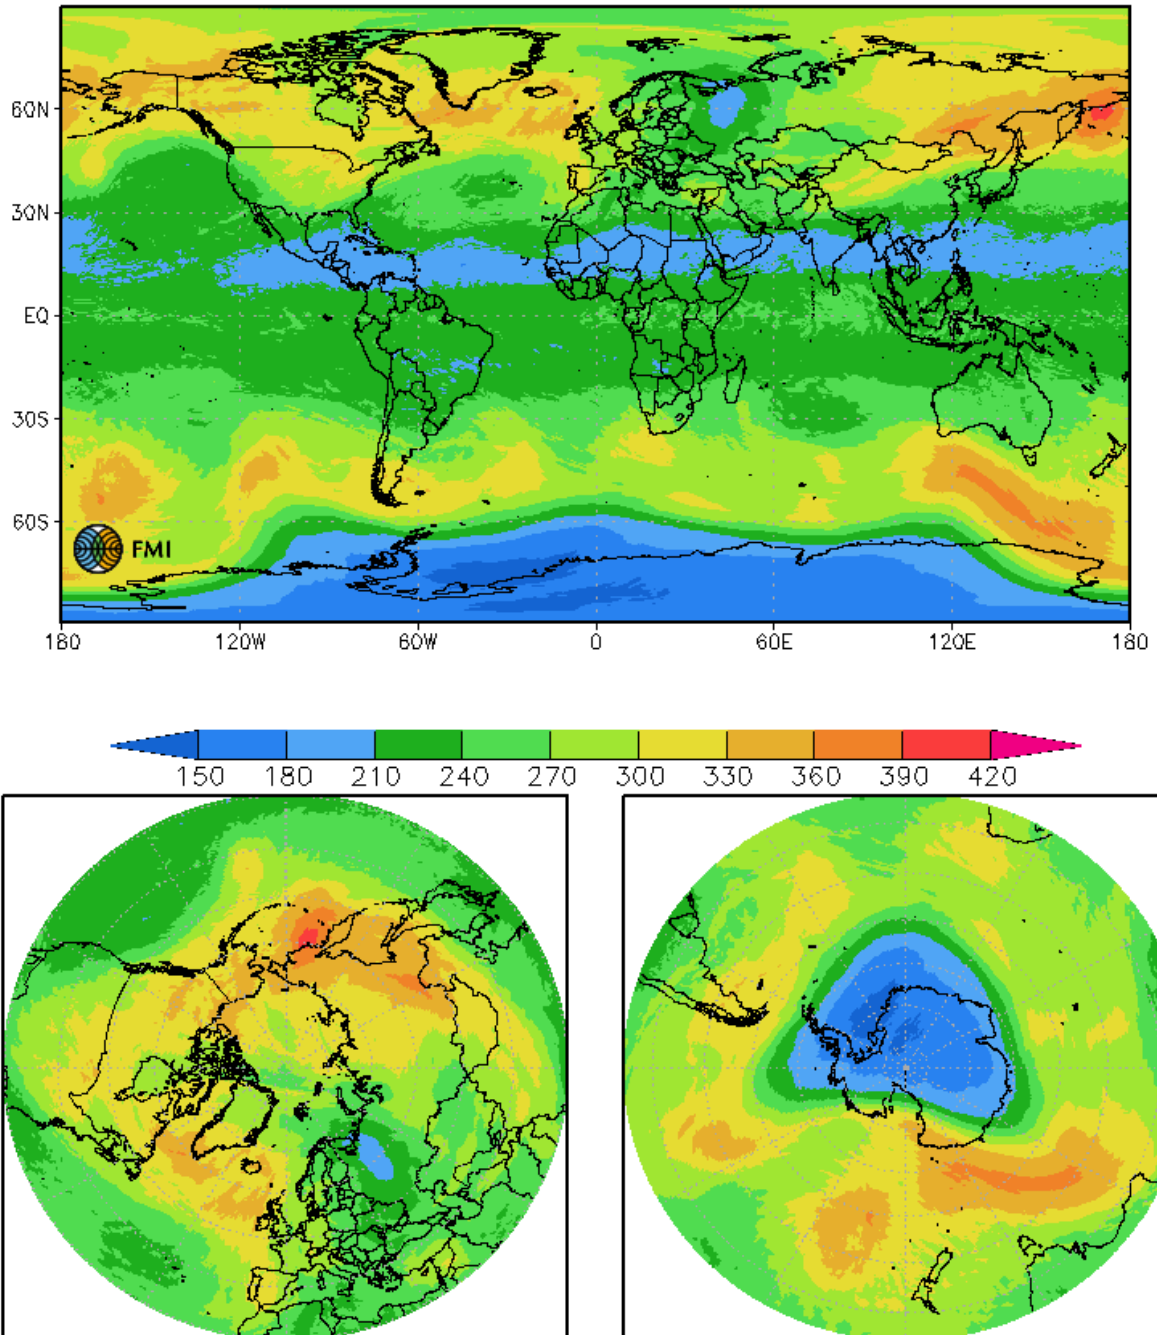

Figure S5. Global ozone column predicted by SILAM on 1.11.2018 for 5.11.2018. [Dobson units]

Forecast for O3 column. Last analysis time: 20181101 00

### O3\_column, DobsonUnit, 12:0006NOV2018

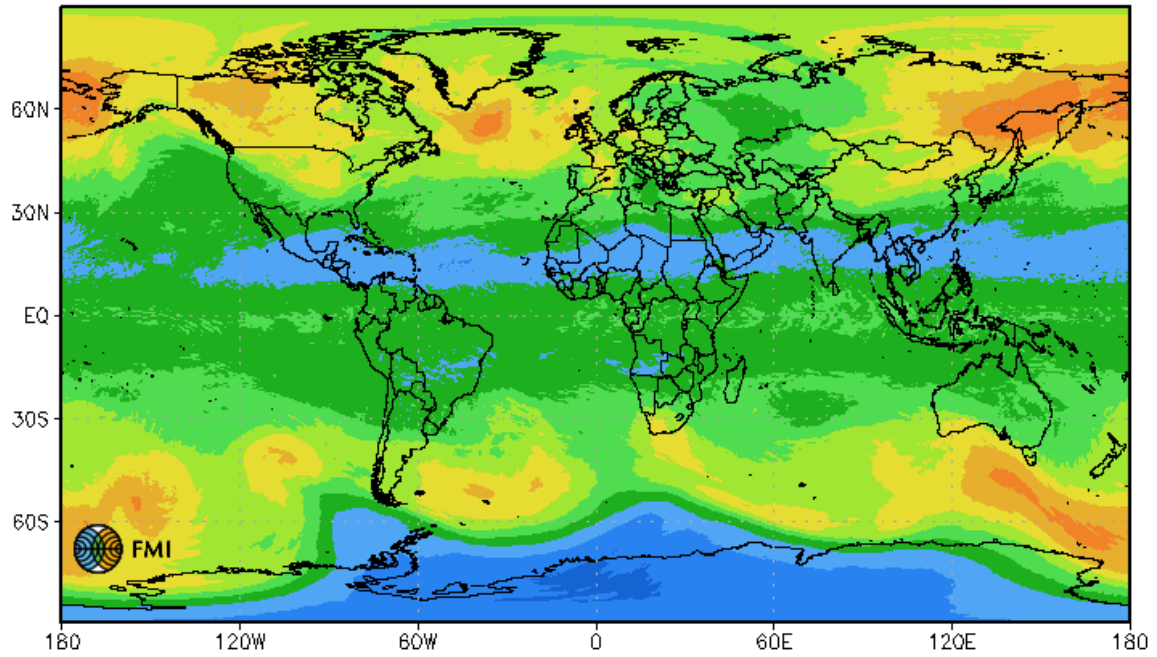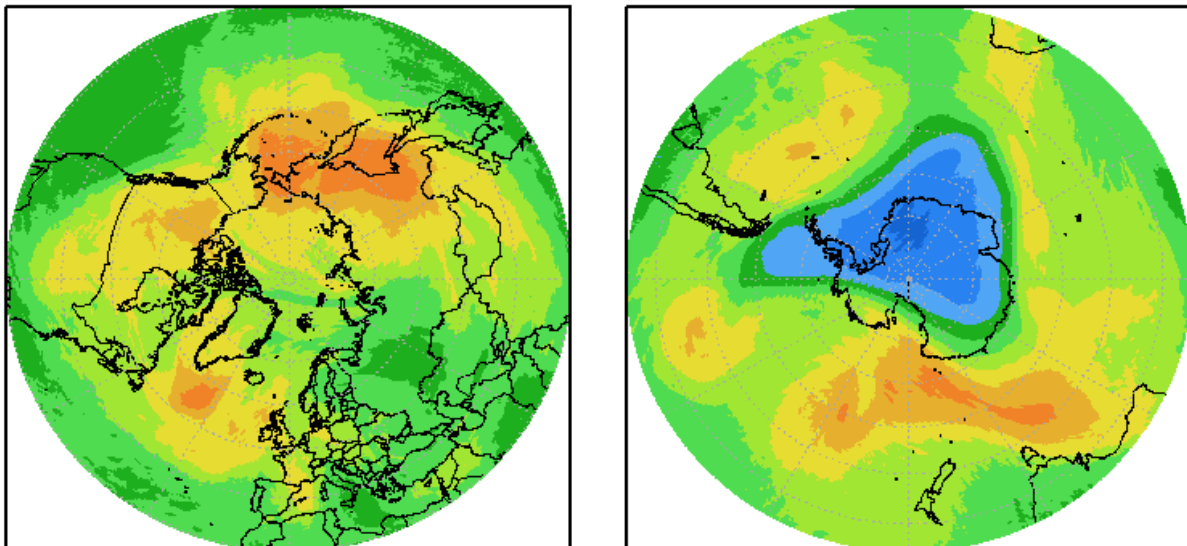

Figure S6. Global ozone column predicted by SILAM on 1.11.2018 for 6.11.2018. [Dobson units]

Forecast for O3 column. Last analysis time: 20181101 00

### O3\_column, DobsonUnit, 12:0007NOV2018

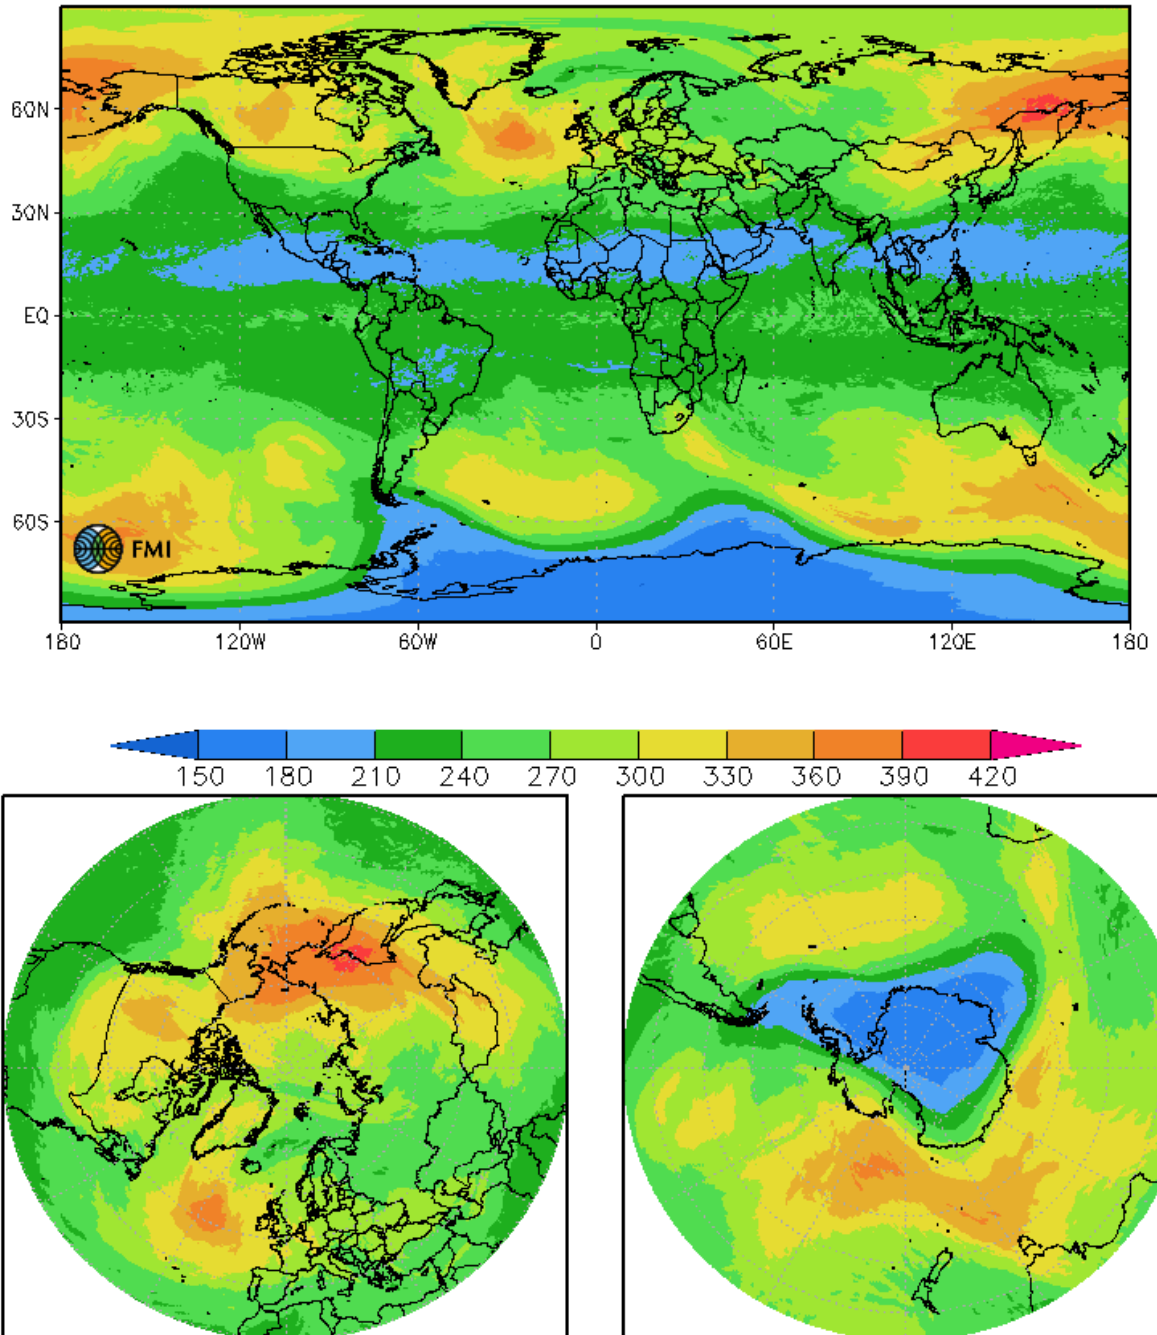

Figure S7. Global ozone column predicted by SILAM on 1.11.2018 for 7.11.2018. [Dobson units]



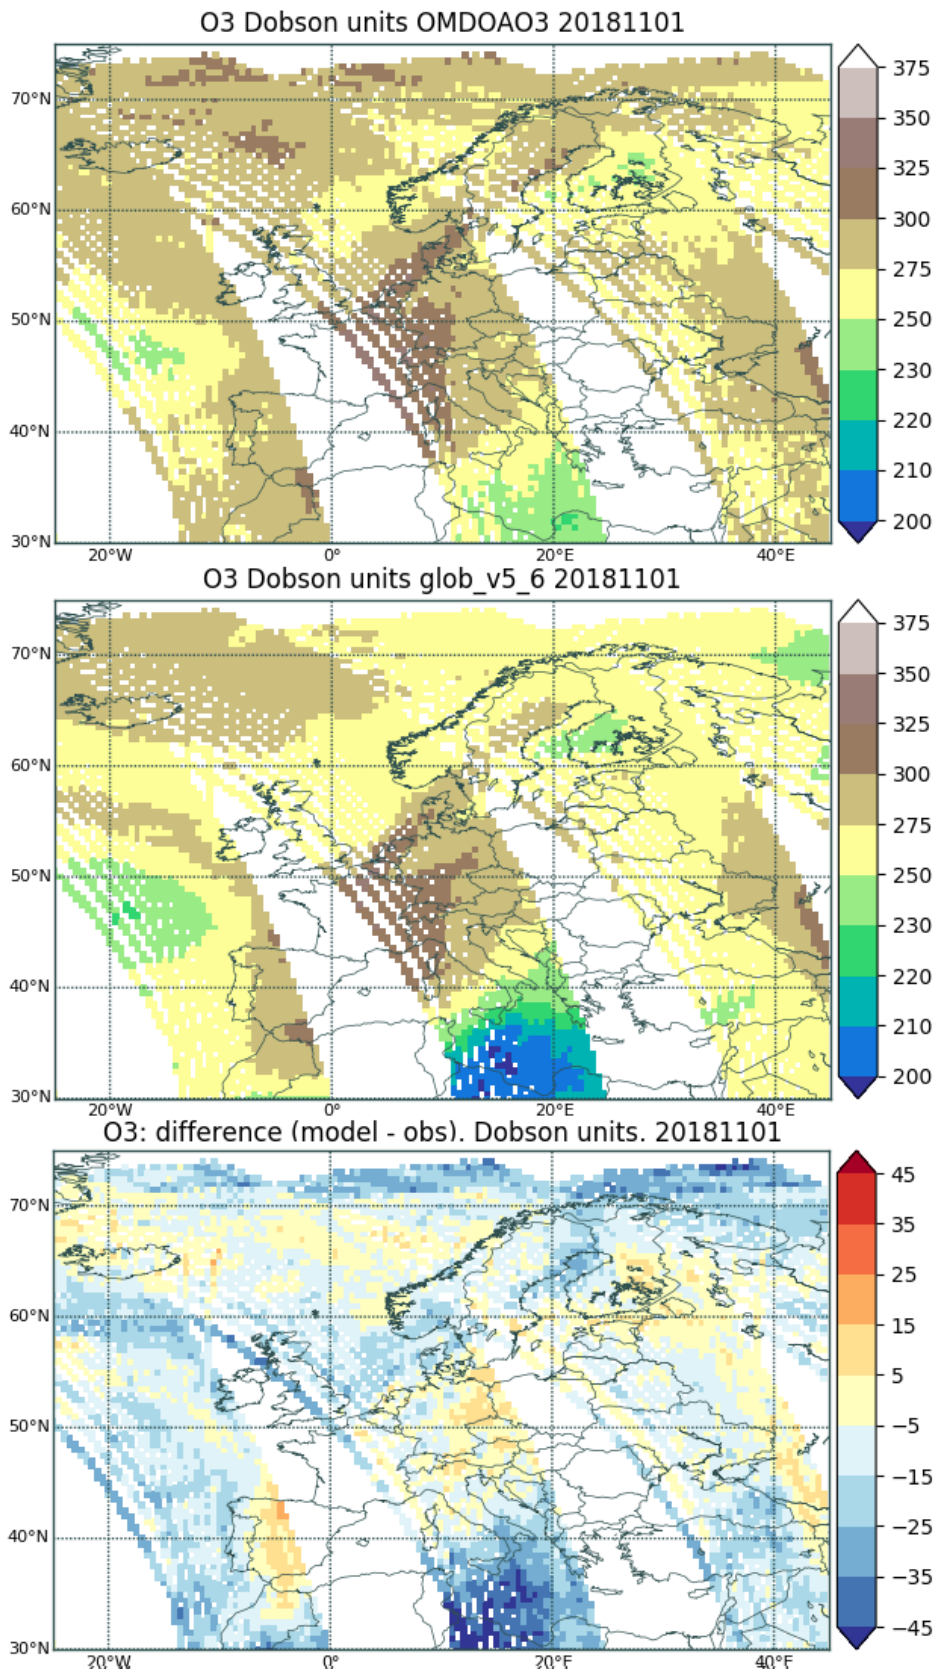

Figure S8. Observed by OMI DOAS (upper panel), predicted by SILAM (middle panel) daily-composite ozone column for 1.11.2018. The lower panel shows the model bias. Only grid cells corresponding to valid OMI observations were retained in the SILAM forecast. [Dobson units]

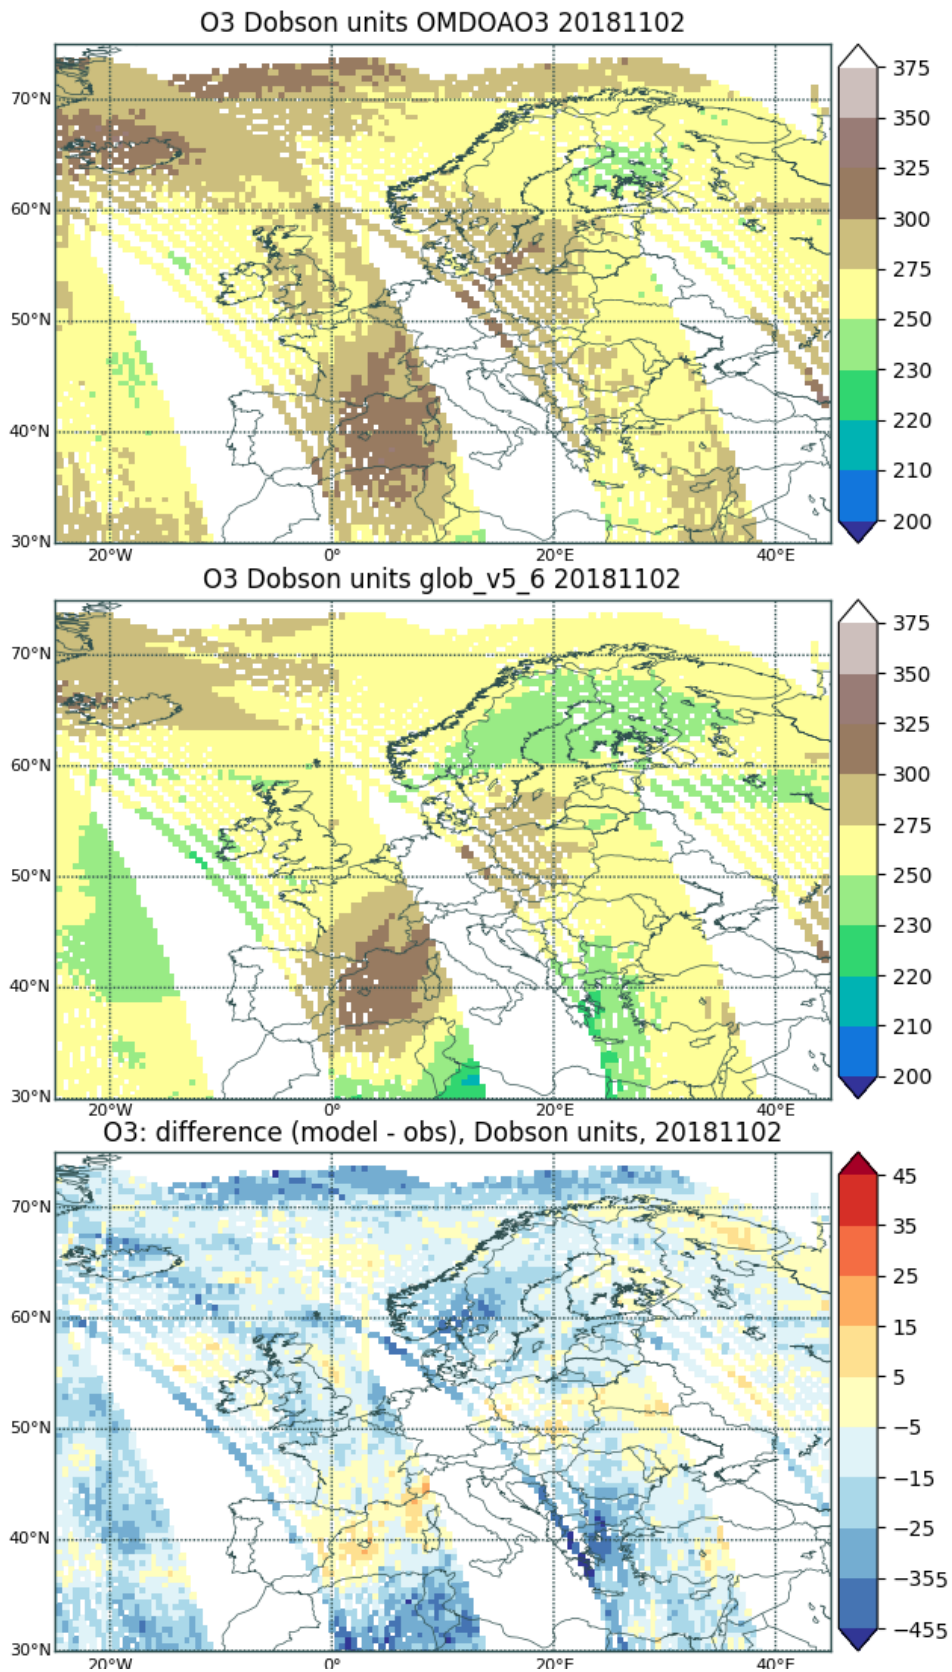

**Figure S9.** Observed by OMI DOAS (upper panel), predicted by SILAM (middle panel) daily-composite ozone column for 2.11.2018. The lower panel shows the model bias. Only grid cells corresponding to valid OMI observations were retained in the SILAM forecast. [Dobson units]

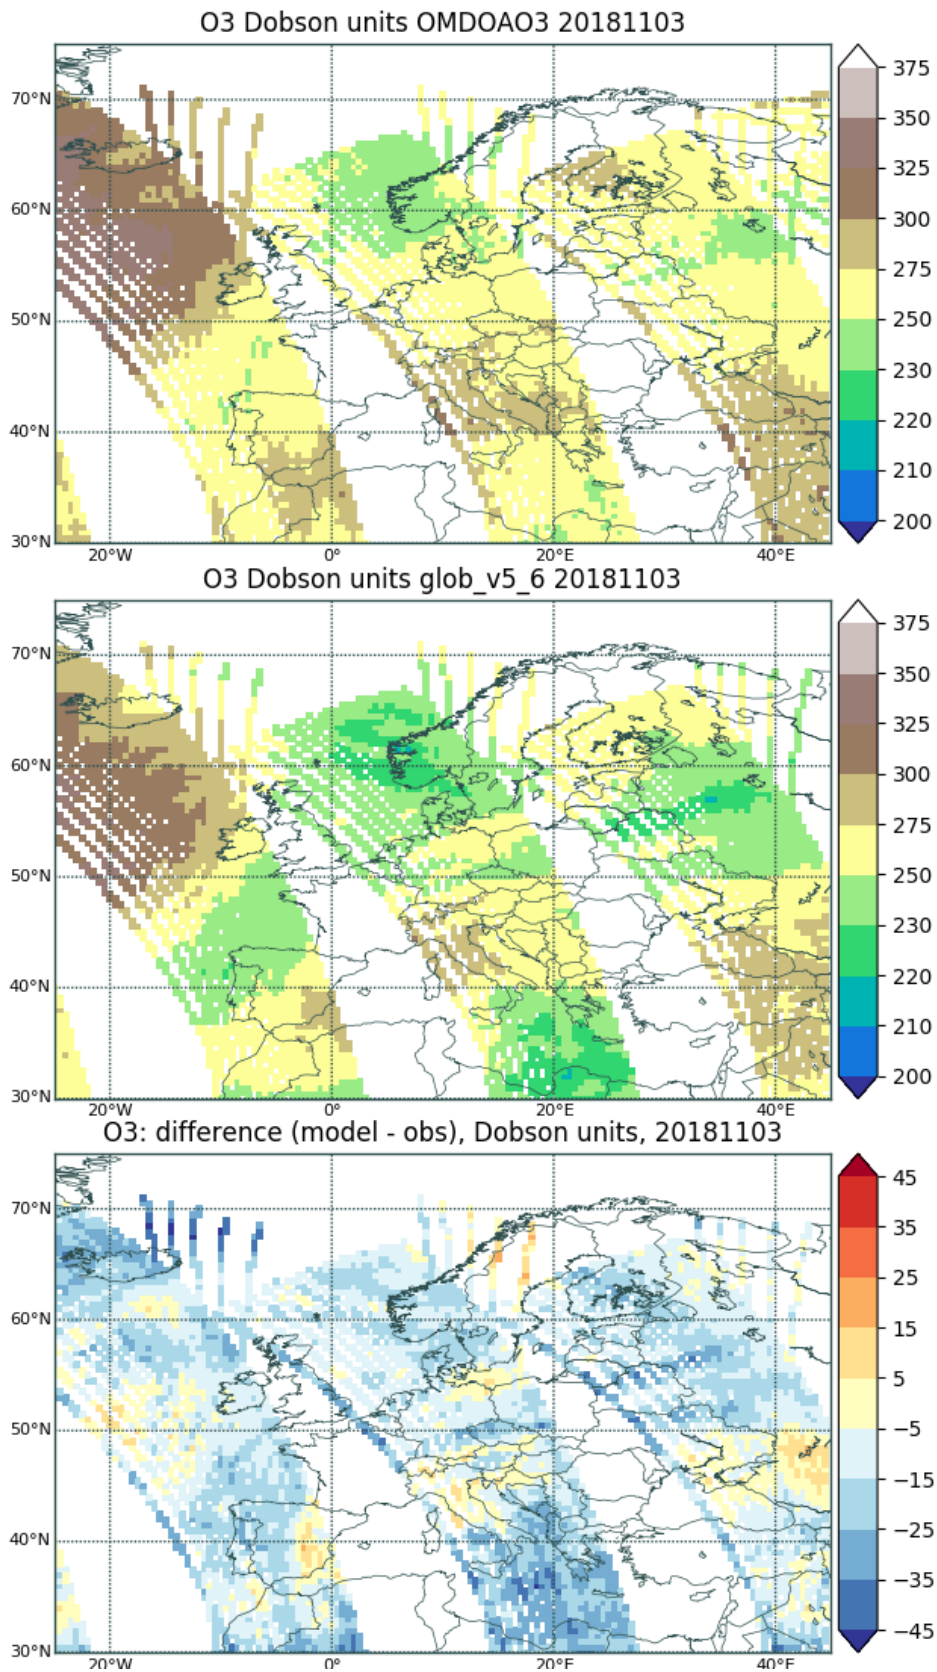

Figure S10. Observed by OMI DOAS (upper panel), predicted by SILAM (middle panel) daily-composite ozone column for 3.11.2018. The lower panel shows the model bias. Only grid cells corresponding to valid OMI observations were retained in the SILAM forecast. [Dobson units]

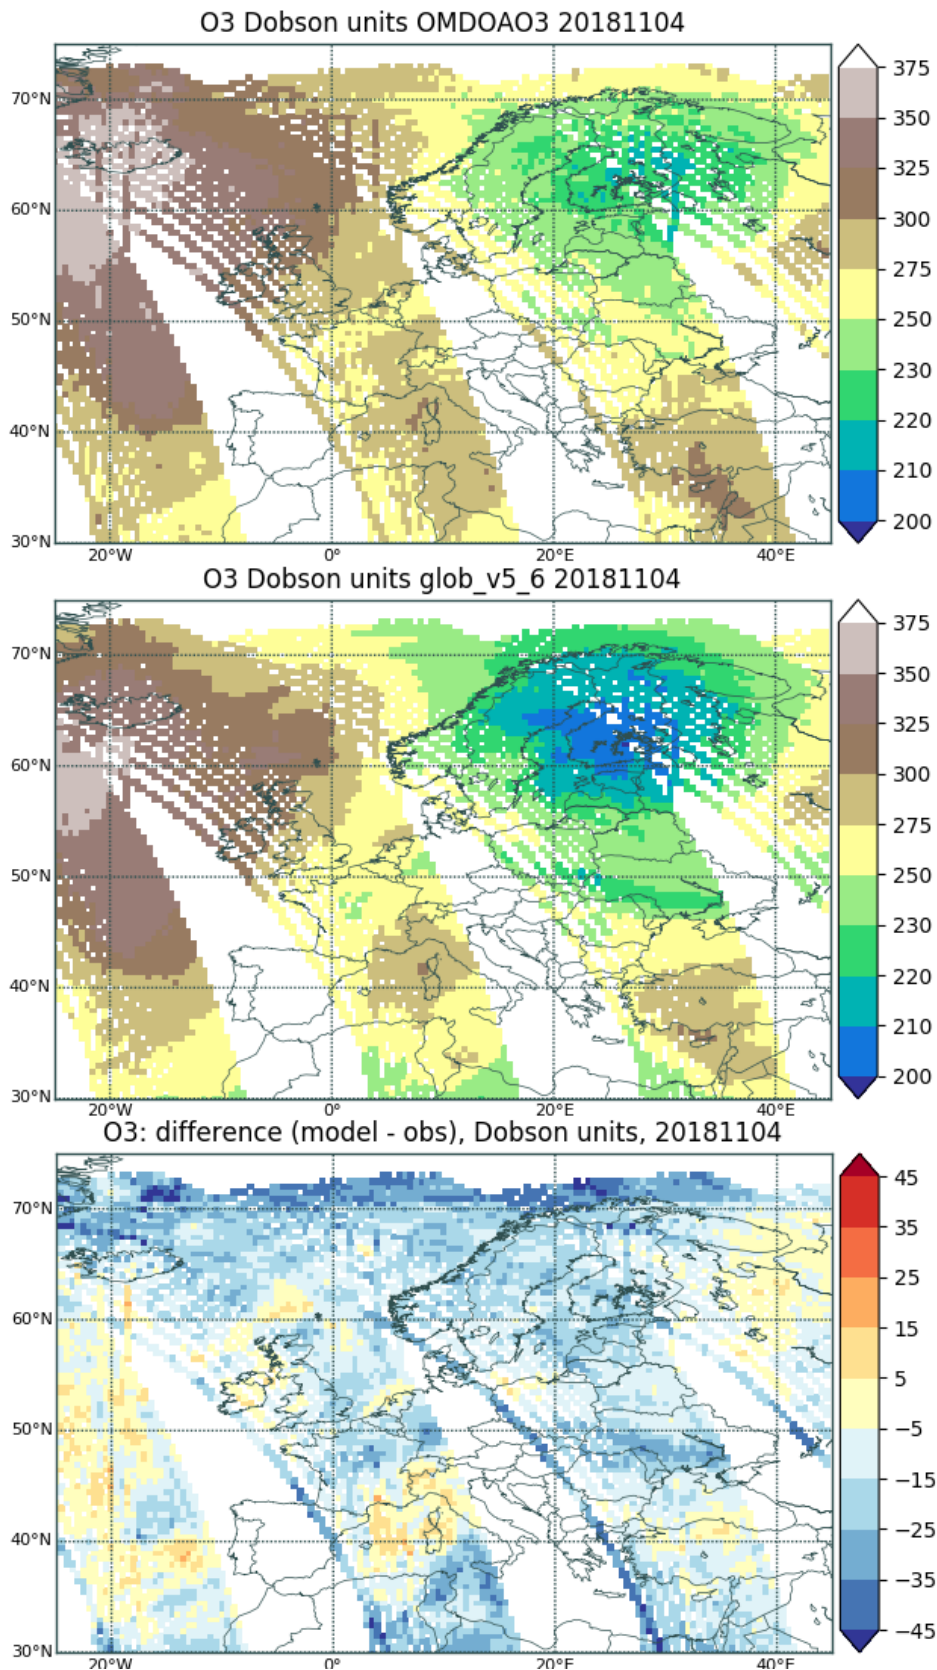

Figure S11. Observed by OMI DOAS (upper panel), predicted by SILAM (middle panel) daily-composite ozone column for 4.11.2018. The lower panel shows the model bias. Only grid cells corresponding to valid OMI observations were retained in the SILAM forecast. [Dobson units]

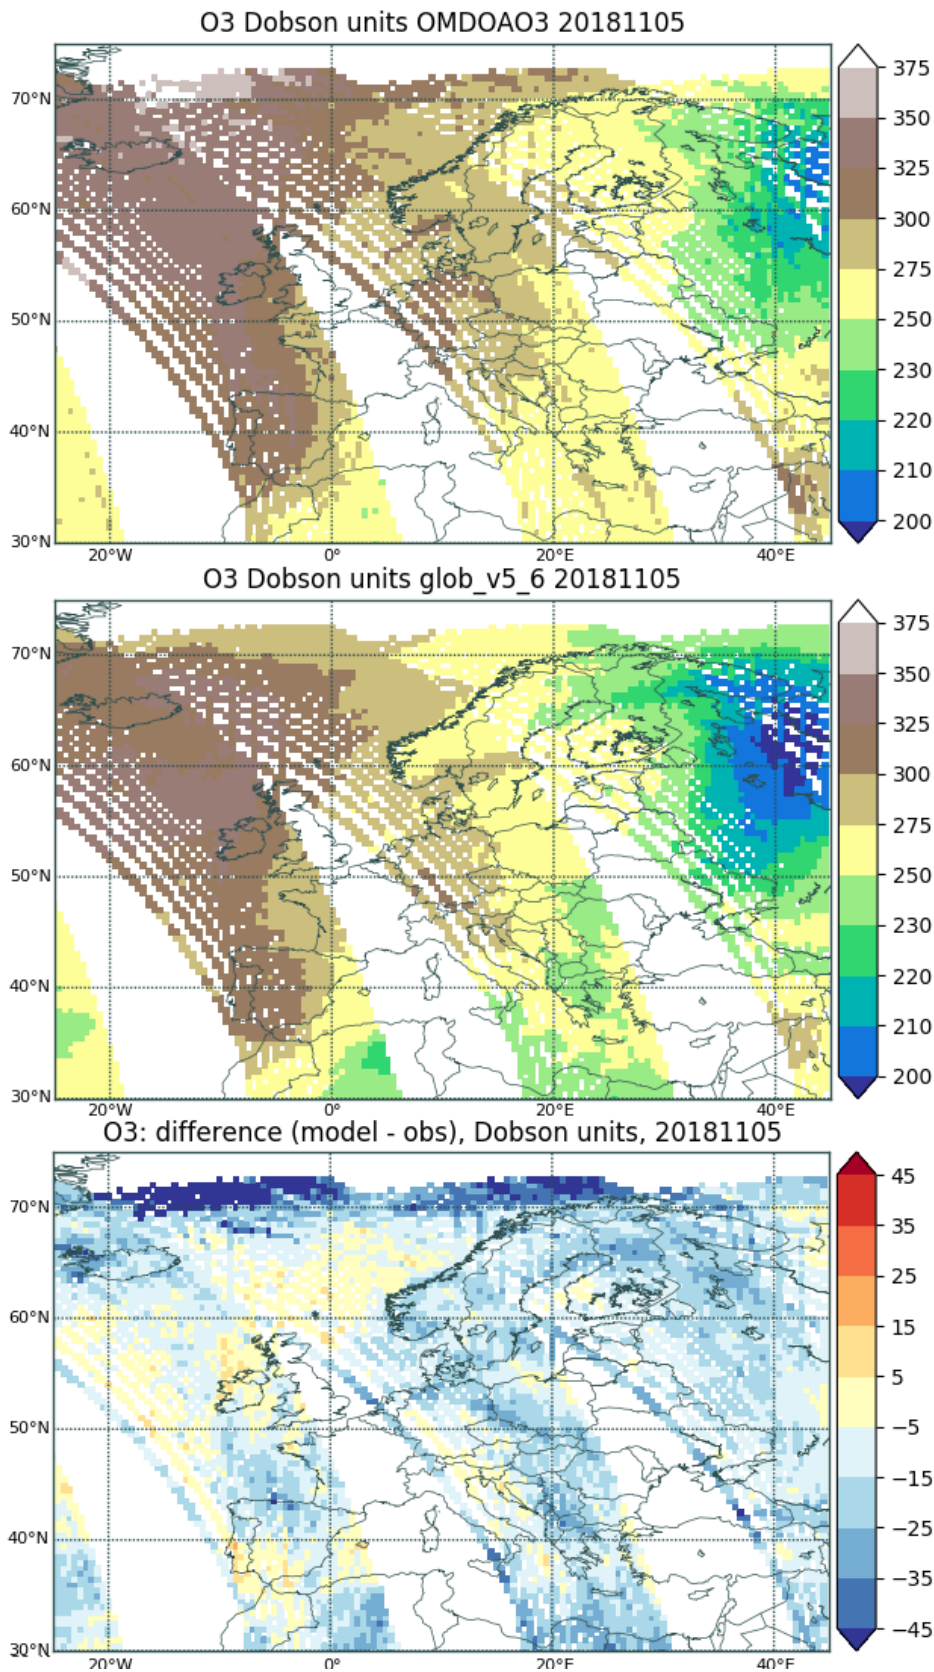

Figure S12. Observed by OMI DOAS (upper panel), predicted by SILAM (middle panel) daily-composite ozone column for 5.11.2018. The lower panel shows the model bias. Only grid cells corresponding to valid OMI observations were retained in the SILAM forecast. [Dobson units]

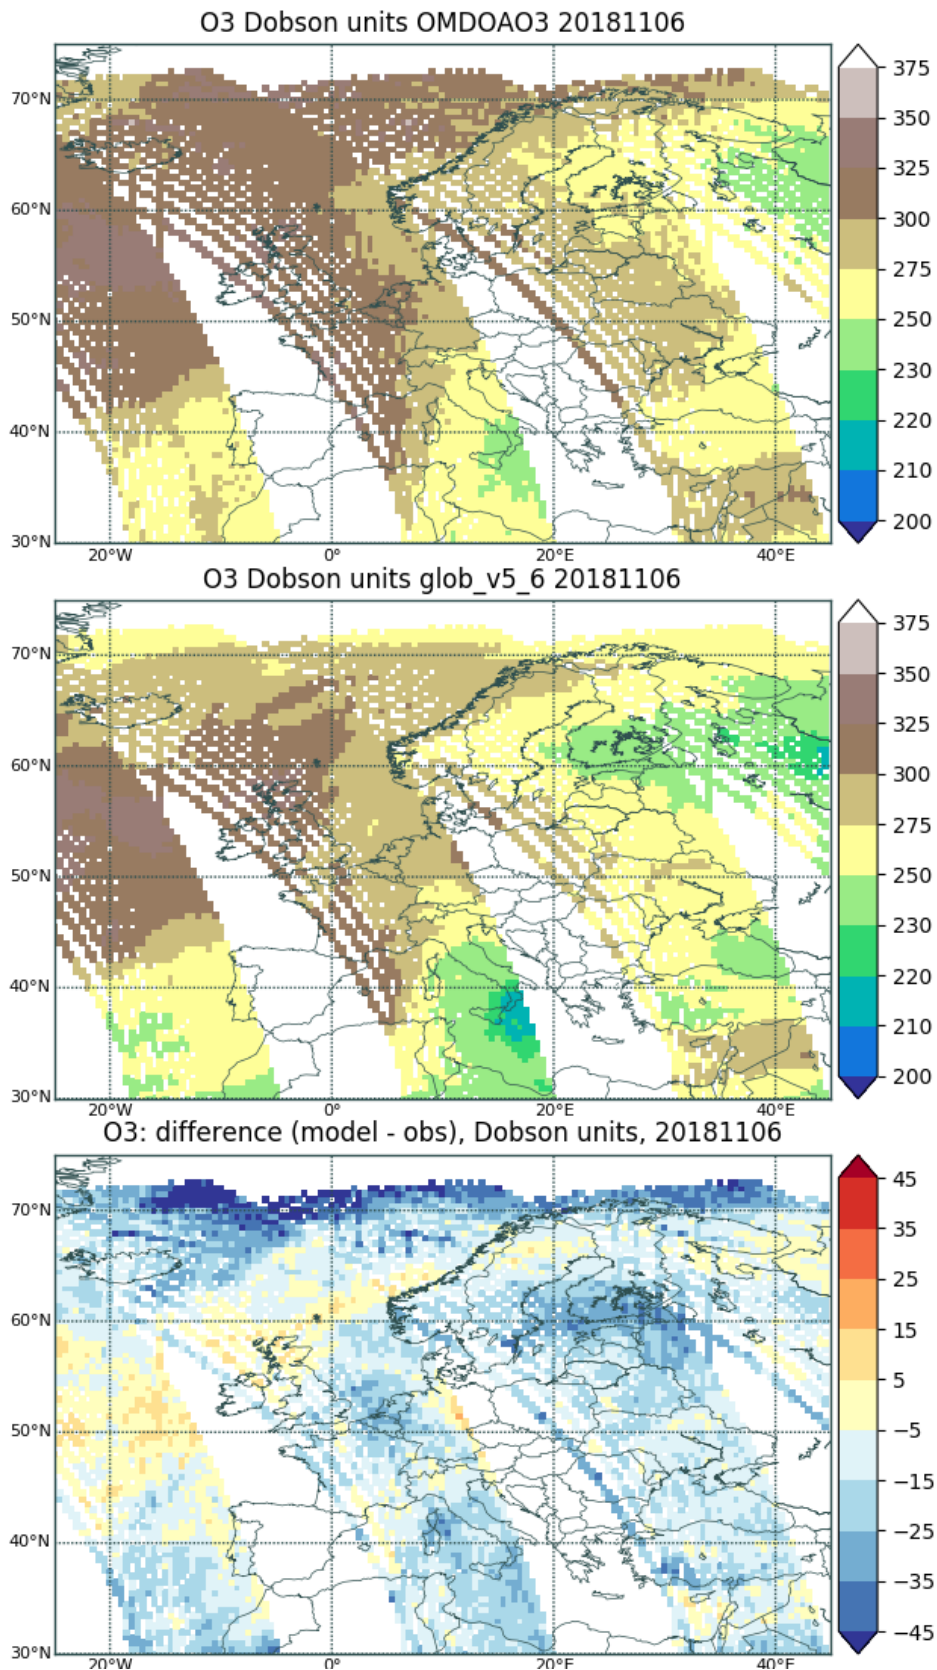

Figure S13. Observed by OMI DOAS (upper panel), predicted by SILAM (middle panel) daily-composite ozone column for 6.11.2018. The lower panel shows the model bias. Only grid cells corresponding to valid OMI observations were retained in the SILAM forecast. [Dobson units]

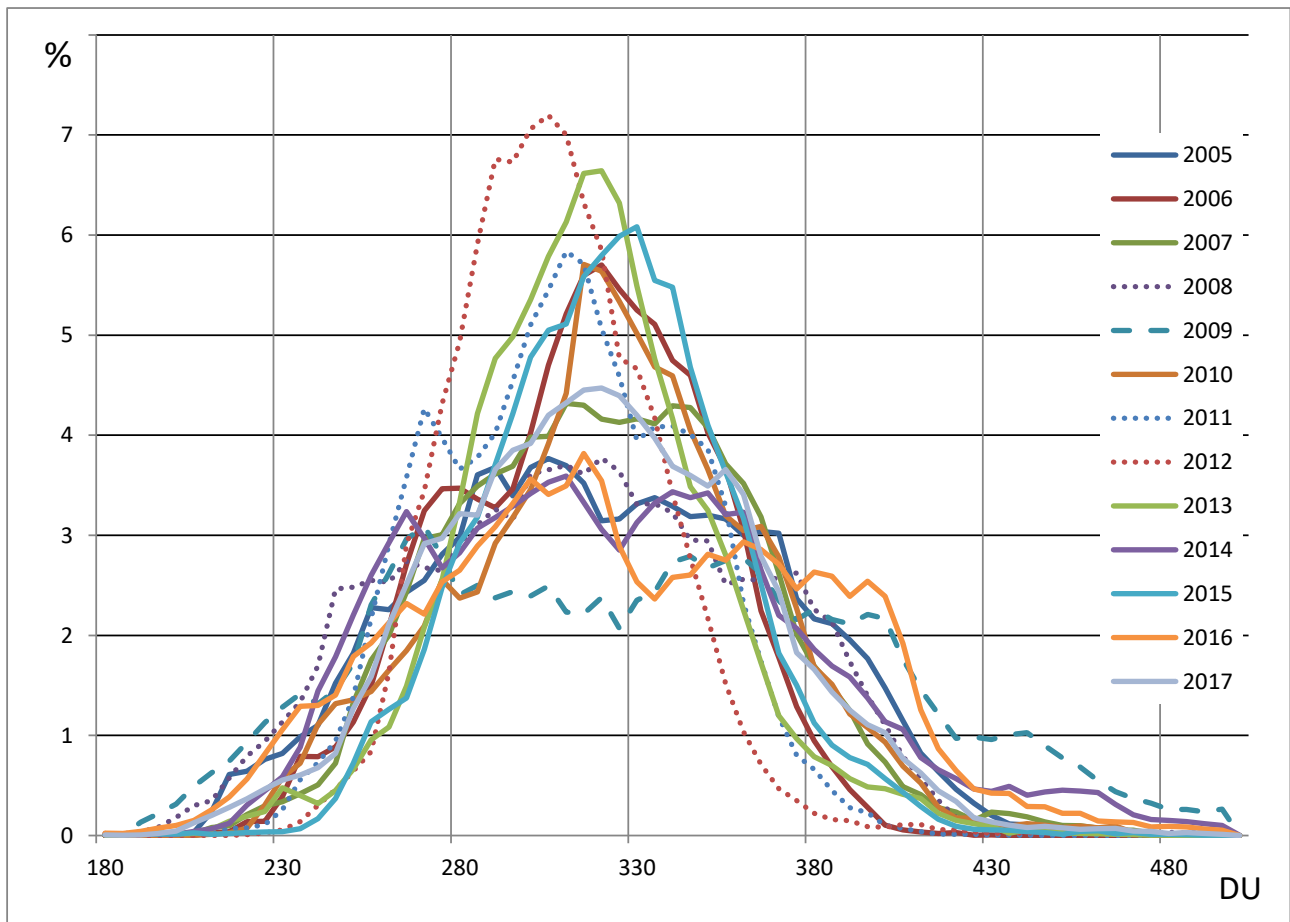

Figure S14. Frequency distribution of ozone total column as observed by OMI for November 2005-2017, latitude belt 60N – 90N. Extreme years are additionally highlighted by the specific line shapes. [Dobson units]
